# Supplementary material for: ColonyArea: An ImageJ Plugin to Automatically Quantify Colony Formation in Clonogenic Assays
Source: PubMed Central journal article supplement (PMC3960247; doi:10.1371/journal.pone.0092444), 2014-03-19

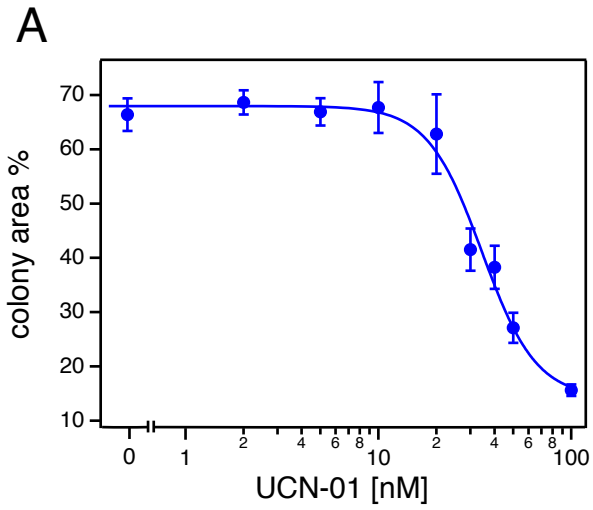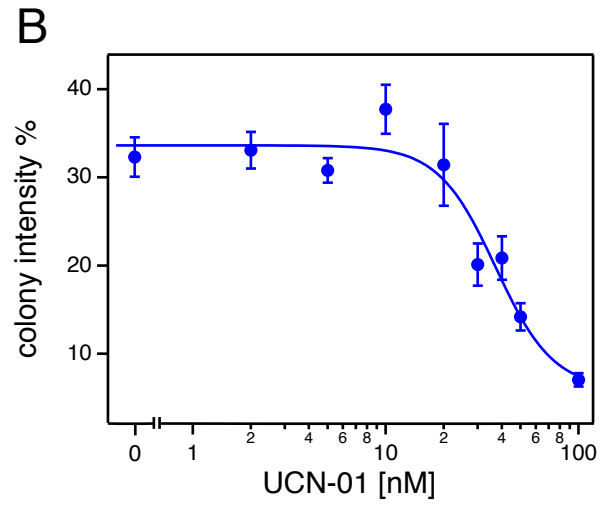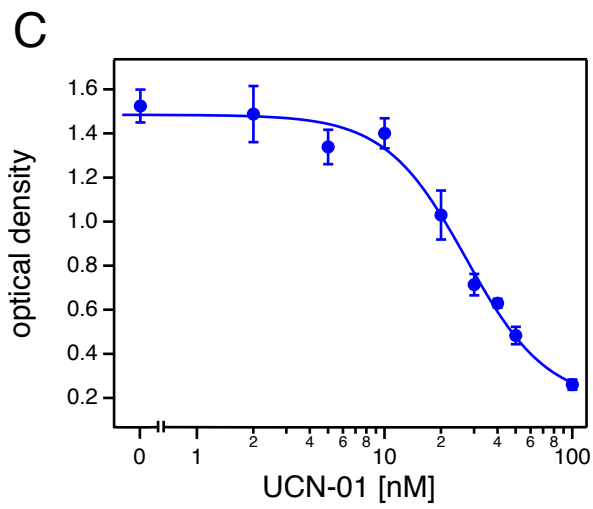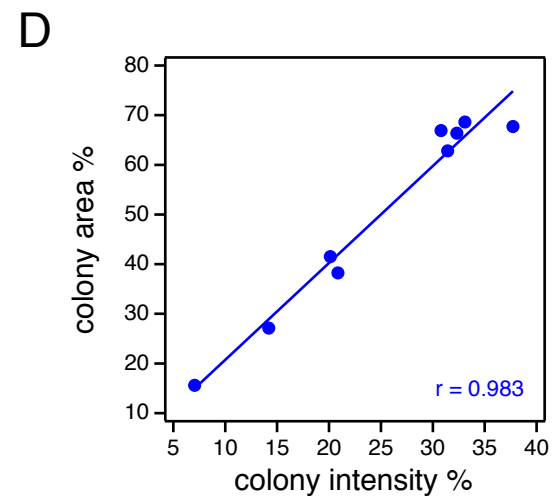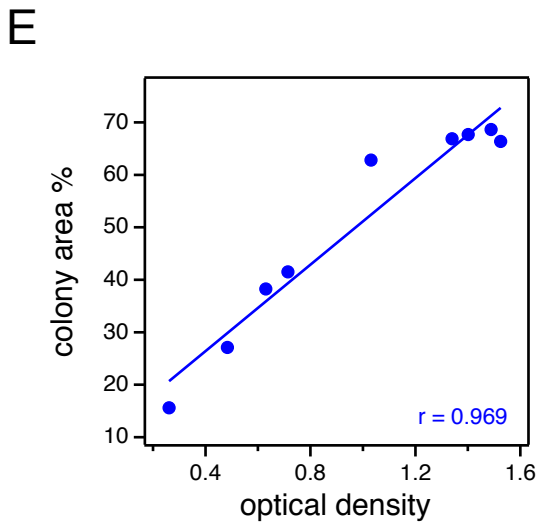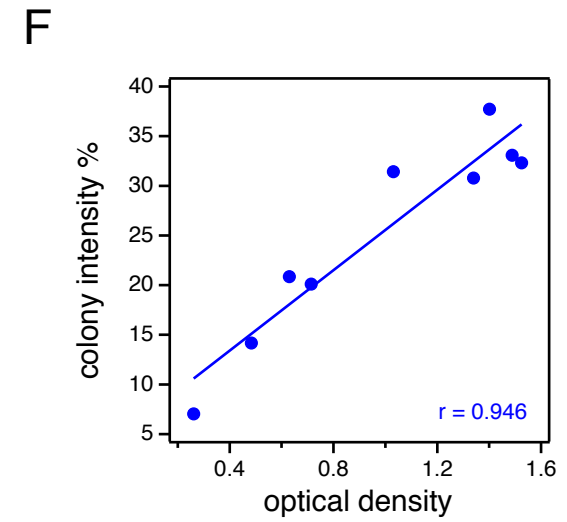

Supplement: pone.0092444.s001.pdf [file pone.0092444.s001.pdf]
